# The molecular weight of NaYF<sub>4</sub>:RE photonic up-conversion nanoparticles

Lewis E. Mackenzie,<sup>[a]</sup> Jack A. Goode,<sup>[a]</sup> Alexandre Vakurov,<sup>[a]</sup> Padmaja P. Nampi,<sup>[b]</sup> Sikha Saha,<sup>[c]</sup> Gin Jose,<sup>[b]</sup> Paul A. Millner.<sup>[a]</sup>

[a] School of Biomedical Sciences, Faculty of Biological Sciences, University of Leeds, United Kingdom, LS2 9JT.

[b] School of Chemical and Process Engineering, Faculty of Engineering, University of Leeds, United Kingdom, LS2 9JT.

[c] Leeds Institute of Genetics, Health and Therapeutics (LIGHT), Faculty of Medicine and Health, University of Leeds, United Kingdom, LS2 9JT.

**Corresponding author:** Lewis MacKenzie [L.MacKenzie1@Leeds.ac.uk](mailto:L.MacKenzie1@Leeds.ac.uk)

## 10 Abstract

Luminescence up-conversion nanoparticles (UCNPs) consisting of a NaYF<sub>4</sub> crystal lattice doped with rare earth (RE) ions have found widespread application in bio-sensing, bio-imaging, and therapeutics; yet the molecular weight of UCNPs is not known. Lack of knowledge of molecular weight of UCNPs results in sub-optimal functionalisation and dosages of UCNPs. We present a simple method for calculating the molecular weight of NaYF<sub>4</sub>:RE UCNPs from arbitrary crystal lattice parameters and UCNP diameter measurements, and we apply this method to estimate the molecular weight of various NaYF<sub>4</sub>:RE UCNPs from the literature. UCNP molecular weight scales exponentially with UCNP volume (i.e. diameter cubed). UCNPs of 10 nm diameter are estimated to be a molecular weight of ~1 MDa, and 45 nm UCNPs are estimated to be ~100 MDa. Hexagonal lattice UCNPs were found to have a greater molecular weight than their cubic lattice UCNP counterparts. A Gaussian distribution of nanoparticle diameters was found to produce a lognormal distribution of nanoparticle molecular weights. We provide stand-alone graphic user interfaces to calculate UCNP:RE molecular weight. This approach can be generalised to estimate the molecular weight of crystalline nanoparticles of arbitrary size, geometry, and elemental composition where nanoparticle unit cell parameters are known.

20

# 1. Introduction

Up-converting nanoparticles (UCNPs) consisting of a low phonon-energy crystal lattice host (typically NaYF<sub>4</sub>) co-doped with rare earth (RE) ions (typically Yb<sup>3+</sup> with Er<sup>3+</sup> and/or Gd<sup>3+</sup>) have recently generated widespread scientific interest as optical platforms for numerous applications, including: imaging contrast labels in cells and animals *in vivo* and *ex vivo*<sup>1–10</sup>; the detection of antibiotics<sup>11</sup> or toxins in food<sup>12–14</sup>; aggressive targeting of cancer cells<sup>15,16</sup>; imaging thermometry<sup>17,18</sup>; enhancement of photovoltaic technology,<sup>19,20</sup> and the measurement of biomarker molecules in biological fluids.<sup>21–</sup>

26

NaYF<sub>4</sub>:RE UCNPs have garnered intense interest due to their unique optical luminescence excitation and emission properties, which are highly advantageous for bio-sensing and bio-imaging applications. NaYF<sub>4</sub>:RE UCNPs absorb multiple near infra-red (NIR) photons (typically ~ 980 nm) and emit luminesce at visible wavelengths via photonic up-conversion.<sup>27</sup> NIR excitation is highly advantageous for biomedical applications because: (1) NIR light can penetrate several centimetres in tissue<sup>28</sup>; (2) NIR light is not phototoxic, and (3) NIR excitation results in no auto-fluorescence from tissue or endogenous proteins. The wavelength and intensity of UCNP luminescence emission can be tuned by altering UCNP composition,<sup>29</sup> the concentrations of RE dopants,<sup>30</sup> altering the UCNP crystal lattice phase,<sup>5,29</sup> and altering nanoparticle surface area to volume ratio.<sup>31</sup> It has become common practice to add protective inert outer shells - typically made of silica - to shield UCNPs from quenching effects by solution and enhance luminescence emission intensity.<sup>32,33</sup> Thus, the optical properties of UCNPs can be tailored to suit individual applications. The surface of NaYF<sub>4</sub>:RE UCNPs are typically functionalised with antibodies<sup>22,24–26</sup> or oligonucleotides<sup>34</sup> to enable specific binding for labelling, bio-sensing, and therapeutic applications. Close proximity of molecules (e.g. a target analyte protein) to the surface of UCNPs results in luminescence energy resonance transfer (LRET) between the UCNP (donor) and a proximal molecule (acceptor), resulting in altered UCNP luminescence emission. The resulting change in luminescence emission depends on the particular physical configuration and optical properties of the UCNP and acceptor molecule.<sup>2,24–26,35,36</sup>

Despite the widespread applications of NaYF<sub>4</sub>:RE UCNPs, the molecular weight of these nanoparticles has not been reported. Consequently, the concentration of UCNPs is typically reported in terms of UCNP weight per volume of aqueous media.<sup>37</sup> This relatively crude measure does not allow the number of UCNPs in a given sample to be known and consequently may result in sub-optimal functionalisation of UCNPs or inaccurate estimation of UCNP dosage for bio-imaging and therapeutic applications. Further, knowing the molecular weight of UCNPs would be helpful in

understanding UCNP behaviour when trapped with optical tweezers<sup>38</sup> and understanding the uptake  
60 of UCNPs by cell membranes.<sup>3,5,39</sup>

This study presents the theory required to calculate the molecular weight of NaYF<sub>4</sub>:RE UCNPs of arbitrary size and RE dopant composition, assuming that crystal lattice parameters are known. The molecular weight of NaYF<sub>4</sub>:RE UCNPs can be calculated from first principles if the lattice parameters and elemental composition of NaYF<sub>4</sub> crystal unit cells are known from X-ray diffraction (XRD) experiments; and if the geometry and diameter of UCNPs are known from transmission electron microscopy (TEM) experiments.<sup>5,6,40</sup> The molecular weight of a UCNP can be estimated by simply dividing the volume of a UCNP by the volume of an individual unit cell to get the number of unit cells in a UCNP. From this, the total molecular weight of a UCNP is calculated summing the atomic weight of all atoms within a single unit cell, and multiplying by the total number of unit cells within the  
70 UCNP. From this theory, we estimate the molecular weight of various NaYF<sub>4</sub>:RE UCNPs reported in the literature. Of particular note, we show that a Gaussian distribution of NaYF<sub>4</sub>:RE UCNP diameters will result in a lognormal (i.e. non-normal) distribution of NaYF<sub>4</sub>:RE UCNP molecular weights.

Additionally, we provide two stand-alone graphical user interfaces (GUIs) to enable others to easily calculate the molecular weight of NaYF<sub>4</sub>:RE UCNPs with arbitrary size, lattice, and RE dopant parameters.

## 2. Theory

### 2.1 Structure and photonic up-conversion of NaYF<sub>4</sub>:RE UCNPs

In NaYF<sub>4</sub>:RE UCNPs, photonic up-conversion is enabled by the sequential absorption of two or more near-infrared photons, which, via excitation of several long-lived metastable electron states,  
80 and subsequent non-radiative multi-phonon and radiative relaxation, produces luminescence emission at visible wavelengths. Up-conversion requires a crystalline host lattice, which is doped with multiple different lanthanide ions (typically Yb<sup>3+</sup> and Er<sup>3+</sup>), where one lanthanide ion (typically Yb<sup>3+</sup>) acts as a photo-sensitizer and the other (typically Er<sup>3+</sup>) emits photons.<sup>33</sup> The up-conversion process is sensitive to the distance between ions and unit cell geometry. Although many different combinations of lattice and RE dopants have been explored,<sup>41</sup> the combination of Yb<sup>3+</sup> and Er<sup>3+</sup> ions in a NaYF<sub>4</sub> host lattice has been found to provide high up-conversion efficiency, and as such is commonly used for UCNPs.<sup>27,42</sup>

NaYF<sub>4</sub>:RE unit cells are typically a cubic crystal lattice arrangement or a hexagonal crystal lattice arrangement. The arrangement of unit cells influences the crystal lattice parameters, consequently  
90 changing photonic properties and density of NaYF<sub>4</sub>:RE UCNPs. Thus, to calculate the molecular

weight of a  $\text{NaYF}_4\text{:RE}$  UCNP for a given size, the atomic weight of a single  $\text{NaYF}_4\text{:RE}$  UCNP unit cell must be determined.

## 2.2. $\text{NaYF}_4\text{:RE}$ unit cells reported in the literature

Several studies have reported crystal lattice parameters for cubic and hexagonal  $\text{NaYF}_4\text{:RE}$  UCNP obtained via x-ray diffraction studies (see Table 1). Wang et al., (2010)<sup>40</sup> report unit cell parameters for cubic ( $\alpha$  phase) and hexagonal ( $\beta$  phase) unit  $\text{NaYF}_4\text{:RE}$  unit cell configurations (see Figure 1). In the face-centred cubic lattice arrangement, high-symmetry cation sites are formed, which are randomly occupied by either Na or RE ions (see Figure 1a). Cubic unit cells follow the formula  $\text{Na}_2\text{Y}_2\text{F}_8$ , with Y ions substituted for other RE ions depending on doping parameters. Hexagonal unit cells follow the formula  $\text{Na}_{1.5}\text{Y}_{1.5}\text{F}_6$ .<sup>40</sup> In the hexagonal lattice arrangement, there are two low-cation symmetry sites, which contain either Na or RE ions (see Figure 1b).

## 2.3. $\text{NaYF}_4\text{:RE}$ size distributions

Synthesising  $\text{NaYF}_4\text{:RE}$  UCNP typically creates spherical UCNP with a range of diameters. For example, Sikora et al., (2013) report a range of UCNP Gaussian distribution of diameters ranging between 15 – 70 nm for a single batch of  $\text{NaYF}_4\text{:Er,Yb}$  UCNP,<sup>5</sup> and Haro-González et al. (2013)<sup>38</sup> report  $\text{NaYF}_4\text{:Er,Yb}$  (2% Er, 18% Yb) UCNP with diameters ranging between ~10 – 50 nm, following a Gaussian distribution.

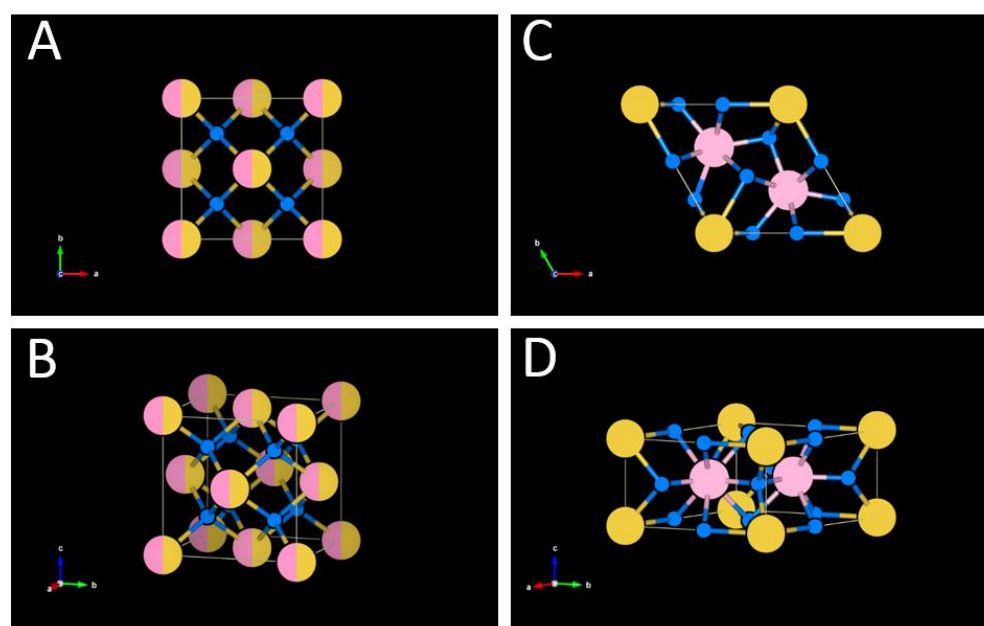

110

**Figure 1.** Unit cell structures of NaYF<sub>4</sub>:RE UCNPs. Colour key: Na ions are yellow; Y and RE dopant ions are pink; and F ions are blue. **(A and B)** Cubic lattice unit cell; Na/Y/RE ions are distributed randomly between the cation sites that are depicted as both pink and yellow. **(C and D)** Hexagonal lattice unit cell. Figures based upon data from Kramer et al., (2004)<sup>30</sup> and Wang et al., (2010).<sup>40</sup> Diagrams created with VESTA (open-source software).<sup>43</sup>

**Table 1.** Crystal lattice parameters of NaYF<sub>4</sub>:RE UCNPs reported in the literature.

| Study                               | NaYF <sub>4</sub> RE dopant composition | UCNP lattice structure | a (Å) | c (Å) | Mean UCNP diameter (nm) | UCNP diameter range (nm) |
|-------------------------------------|-----------------------------------------|------------------------|-------|-------|-------------------------|--------------------------|
| Sikora et al., (2013). <sup>5</sup> | 30% Yb, 2% Er                           | Cubic                  | 5.51  | -     | ~ 30                    | 15 -70                   |
| Cao et al., 2010. <sup>6</sup>      | 20% Yb, 2% Er                           | Hexagonal              | 5.960 | 3.510 | 33 ± 1 nm               | 32 - 34 nm               |
| Wang et al., 2010. <sup>40</sup>    | 18% Yb , 2% Er                          | Hexagonal              | 5.96  | 3.53  | Not reported            | Not reported             |
| Wang et al., 2010. <sup>40</sup>    | 18% Yb, 2% Er, 60% Gd,                  | Hexagonal              | 6.02  | 3.60  | Not reported            | Not reported             |

120

## 2.4. Number of NaYF<sub>4</sub> unit cells in a UCNP

The volume of a spherical nanoparticle ( $V_{UCNP}$ ) is given by:

$$V_{UCNP} = \frac{4}{3} \pi r^3, \quad (1)$$

where  $r$  is the radius of the UCNP. NB: Equation 1 can be changed to calculate arbitrary non-spherical nanoparticle geometries if desired. If the cubic lattice parameter  $a_c$  is known, then the volume of a cubic unit cell ( $uV_{cubic}$ ) is calculated by:

$$uV_{cubic} = a_c^3. \quad (2)$$

If the hexagonal lattice parameters  $a_h$  and  $c_h$  are known, then the volume of a hexagonal unit cell ( $uV_{hexagonal}$ ) is calculated by:

$$uV_{hexagonal} = \frac{2\sqrt{3}}{4} a_h^2 c_h. \quad (3)$$

The number of unit cells in a given UCNP ( $uN_{cubic}$  or  $uN_{hexagonal}$ ) can then be calculated by:

$$uN_{cubic} = V_{UCNP}/uV_{cubic}, \quad (4)$$

$$uN_{hexagonal} = V_{UCNP}/uV_{hexagonal}. \quad (5)$$

## 130 2.5. Atomic weight of NaYF<sub>4</sub> unit cell

Assuming no RE dopants, the atomic weight of a single cubic NaYF<sub>4</sub> ( $uAW_{cubic}$ ) or hexagonal NaYF<sub>4</sub> unit cell ( $uW_{hex}$ ) are described by:

$$uAW_{cubic} = (2 \times AW_{Na}) + (2 \times AW_Y) + (8 \times AW_F), \quad (6)$$

$$uAW_{hex} = (1.5 \times AW_{Na}) + (1.5 \times AW_Y) + (6 \times AW_F). \quad (7)$$

Where  $AW_{Na}$ ,  $AW_Y$ , and  $AW_F$  are the atomic weight of Sodium, Yttrium, and Fluorine respectively (see Table 2). If RE dopant ions are added, a fraction of Y<sup>3+</sup> ions are substituted for RE<sup>3+</sup> dopant ions, and thus the average atomic mass of unit cells within an UCNP is altered. Thus, RE doping can be accounted for by defining an additive-factor ( $af$ ):

$$af = fRE_{d1} + fRE_{d2} \dots + fRE_{dn}, \quad (8)$$

where  $fRE_{d1}$  to  $fRE_{dn}$  is the fractional percentage of up to  $n$  RE dopants. The additive factor is a numeric value between 0 and 1, representing 0% and 100% Y substitution, respectively. The atomic mass of a single cubic or hexagonal unit cell whilst accounting for RE dopants can thus be

140 calculated by:

$$\begin{aligned} uAW_{cubic} RE_{Doped} = & (2 \times AW_{Na}) + (8 \times AW_F) + (2(1 - af) \times \\ & AW_Y) + (2 \times fRE_{d1} \times AW_{RE_{d1}}) + (2 \times fRE_{d2} \times AW_{RE_{d2}}) + \dots + \\ & (2 \times fRE_{dn} \times AW_{RE_{dn}}), \end{aligned} \quad (9)$$

$$uAW_{hexagonal}RE_{Doped} = (1.5 \times AW_{Na}) + (6 \times AW_F) + (1.5(1 - af) \times W) + (1.5 \times fRE_{d1} \times AW_{RE_{d1}}) + (1.5 \times fRE_{d2} \times AW_{RE_{d2}}) + \dots + (1.5 \times fRE_{dn} \times AW_{RE_{dn}}). \quad (10)$$

Where  $uAW_{cubic}RE_{Doped}$  and  $uAW_{hexagonal}RE_{Doped}$  are the average atomic weight of RE doped cubic and hexagonal unit cells, respectively.

**Table 2:** Standard atomic weight of elements typically utilised in NaYF<sub>4</sub>:RE UCNP.

Data from Meija et al., (2013).<sup>44</sup>

| Element | Standard atomic weight |
|---------|------------------------|
| Na      | 22.989                 |
| F       | 18.998                 |
| Y       | 88.905                 |
| Yb      | 173.054                |
| Er      | 167.259                |
| Gd      | 157.25                 |

## 2.6. Molecular weight of a NaYF<sub>4</sub> UCNP

Assuming that unit cells are distributed uniformly throughout the UCNP, the molecular weight of a cubic lattice UCNP ( $MW_{cubic}$ ) is calculated from Equations 4 and 9 as:

$$MW_{cubic} = uAW_{cubic}RE_{Doped} \times uN_{cubic}. \quad (11)$$

From Equations 5, the molecular weight of a hexagonal lattice UCNP ( $MW_{hexagonal}$ ) is calculated by:

$$MW_{hexagonal} = uAW_{hexagonal}RE_{Doped} \times uN_{hexagonal}. \quad (12)$$

From Equations 4, 5, 11, and 12, it can be seen that the molecular weight of UCNP scales with UCNP volume: i.e. diameter cubed.

## 3. Methods

### 3.1. Molecular weight of cubic and hexagonal NaYF<sub>4</sub> UCNP

Using the theory presented in Sections 2.4 – 2.6, the molecular weight of NaYF<sub>4</sub> hexagonal and cubic lattice UCNP were calculated, assuming the following generic lattice parameters: cubic lattice parameter  $a = 5.51 \text{ \AA}$ ; hexagonal lattice parameters  $a = 5.91 \text{ \AA}$ ,  $c = 3.53 \text{ \AA}$ .

### 3.2. The effect of RE doping

The effect of RE doping was investigated by using the theory presented in Sections 2.4 – 2.6 to calculate the molecular weight of NaYF<sub>4</sub>:RE UCNP with various concentrations of Yb<sup>3+</sup> and Er<sup>3+</sup> dopant ions, up to 30 M% of total RE ions.

### 3.3 Molecular weight of NaYF<sub>4</sub>:RE UCNP from the literature

The molecular weight of NaYF<sub>4</sub>:RE UCNP reported in the literature was calculated by incorporating various lattice parameters and dopant M% from the literature into the theory presented in Sections 2.4 – 2.6.

170

### 3.4. UCNP diameter distribution vs. molecular weight distribution

The size distribution of a single batch of NaYF<sub>4</sub>:YbEr UCNP was reproduced from data presented in Sikora et al.<sup>5</sup> A Gaussian fit was applied to this size distribution data by using non-linear least squares fitting in MATLAB (MATLAB 2016a, MathWorks) and the corresponding molecular weight distribution was calculated by the theory presented in Sections 2.4 – 2.6.

### 3.5. Stand-alone GUIs for calculation of nanoparticle molecular weight

Two graphic user interfaces (GUIs) were written in MATLAB, each incorporating different features. The first simple GUI was developed to enable other researchers to calculate the molecular weight of spherical NaYF<sub>4</sub>:RE UCNP for a user-defined nanoparticle size range. The second, more powerful, GUI was designed to enable users to estimate the molecular weight of nanoparticles with arbitrary nanoparticle geometry; arbitrary lattice parameters; and arbitrary elemental composition, across a user-defined range of characteristic nanoparticle sizes. Additional technical information for both GUIs is provided in the supplementary material section. The stand-alone GUIs developed are shown in supplemental Figures S1 and S2.

180



## 4. Results

### 4.1. Molecular weight of cubic and hexagonal NaYF<sub>4</sub>:RE UCNPs

As expected, the molecular weight of UCNPs scaled proportionally to the volume of the UCNPs, resulting in a large increase of UCNP molecular weight for a comparatively small increase in UCNP diameter. Hexagonal lattice UCNPs were found to have a considerably greater molecular weight than cubic lattice UCNPs due to the lower volume of hexagonal unit cells (see Figure 2).

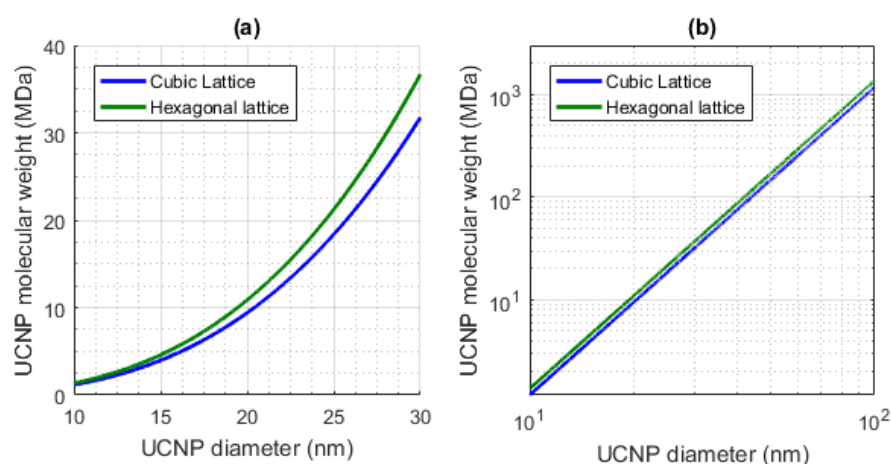

**Figure 2. UCNP diameter vs. UCNP molecular weight for hexagonal and cubic NaYF<sub>4</sub> UCNPs.** Lattice parameters are assumed to be:  $a = 5.51 \text{ \AA}$  for cubic UCNPs;  $a, c = 5.91 \text{ \AA}$  and  $3.53 \text{ \AA}$  for hexagonal UCNPs. **(a)** The exponential increase of molecular weight with diameter is apparent. **(b)** The same data on a logarithmic scale.

## 4.2. The effect of RE doping

The effect of RE ion doping on molecular weight of UCNPs was investigated by varying the percentage of RE dopants. Increasing  $\text{Yb}^{3+}$  or  $\text{Er}^{3+}$  was found to increase the molecular weight of UCNPs (see Figure 3). The increased UCNP mass is because  $\text{Yb}^{3+}$  and  $\text{Er}^{3+}$  have a greater atomic mass than  $\text{Y}^{3+}$ . The difference in molecular weight of UCNPs doped with  $\text{Yb}^{3+}$  and  $\text{Er}^{3+}$  was relatively small to the small difference between the atomic weight of  $\text{Yb}^{3+}$  and  $\text{Er}^{3+}$  (see Table 2). Hexagonal lattice UCNPs show a slightly higher increase in molecular weight for a given dopant concentration than cubic lattice UCNPs due to the smaller unit cell volume of hexagonal lattices compared to cubic lattices.

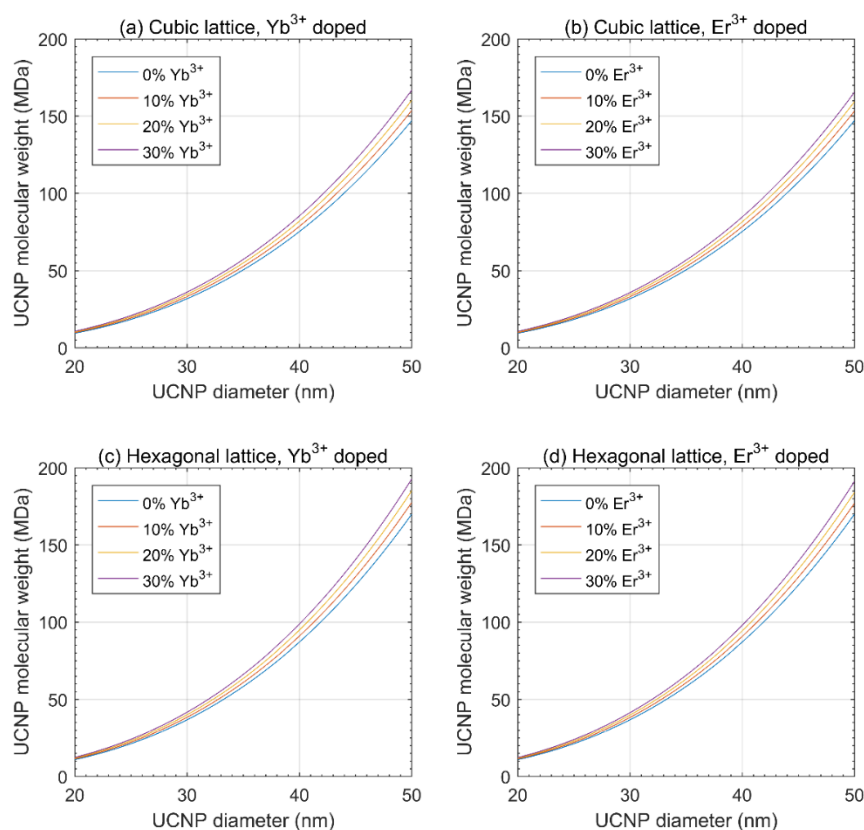

210

**Figure 3. The effect of RE doping on UCN molecular weight. (a, b)**

The molecular weight of cubic lattice  $\text{NaYF}_4\text{:RE}$  UCNPs ( $a = 5.51 \text{ \AA}$ ) for increasing dopant percentage of  $\text{Yb}^{3+}$  and  $\text{Er}^{3+}$ . **(c - d)** The molecular weight of hexagonal lattice  $\text{NaYF}_4$  UCNPs ( $a = 5.91 \text{ \AA}$ ;  $c = 3.53 \text{ \AA}$ ) for increasing dopant percentage of  $\text{Yb}^{3+}$  and  $\text{Er}^{3+}$ . NB: calculations assume that lattice parameters remain constant.

### 4.3. Molecular weight of NaYF<sub>4</sub>:RE UCNP reported in the literature

220 The estimated molecular weight of various NaYF<sub>4</sub>:RE UCNP reported in the literature are shown in Figure 4.

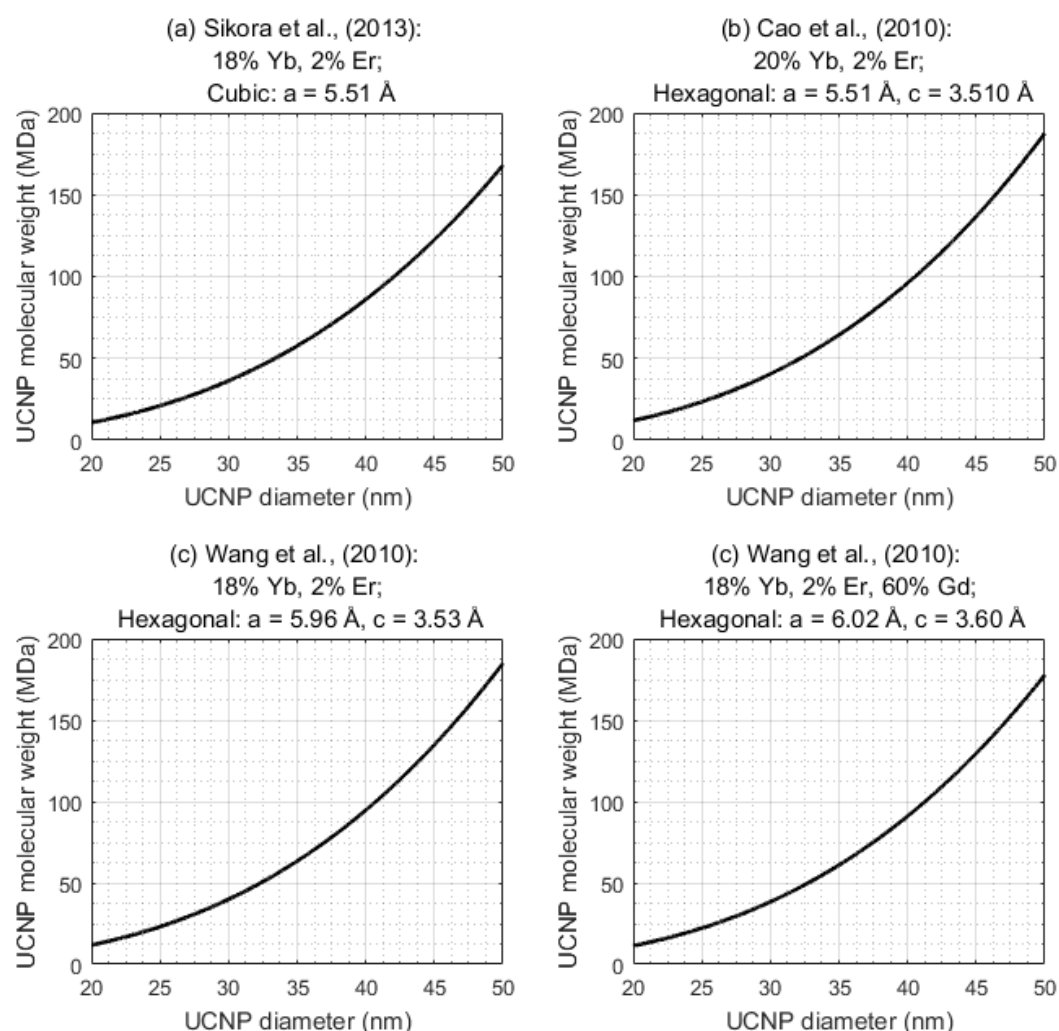

**Figure 4. Estimated molecular weight of various UCNP reported in the literature.**

**(a)** UCNP from Sikora et al., (2013).<sup>5</sup> **(b)** UCNP from Cao et al., (2010).<sup>6</sup> **(c - d)** UCNP from Wang et al., (2010).<sup>40</sup>

#### 4.4. UCNP diameter distribution vs. molecular weight distribution

UCNP diameter distribution data was reproduced from Sikora et al., (2013) (see Figure 5a) and was well-fitted by a Gaussian distribution ( $R^2 = 0.96$ ). The corresponding molecular weight distribution was then calculated for each UCNP diameter. The resultant molecular weight is shown in Figure 5b. A Gaussian fit to the molecular weight distribution plotted on a logarithmic scale produces an excellent fit ( $R^2 = 0.98$ ), establishing that a Gaussian diameter distribution of nanoparticles follows lognormal distribution of molecular weight (see Figure 5c).

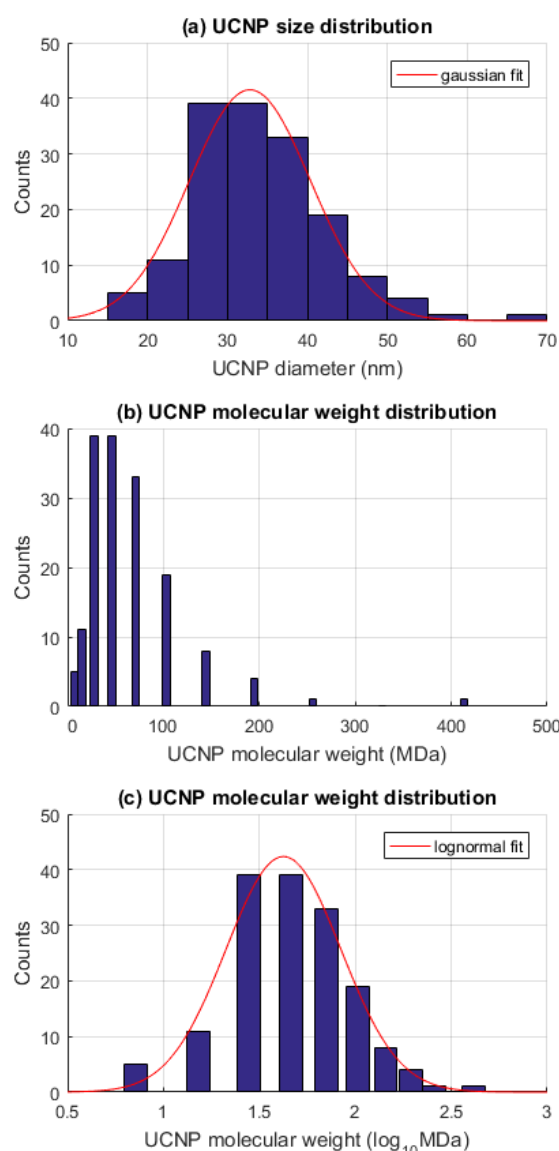

**Figure 5. Gaussian size distributions give rise to lognormal molecular weight distributions. (a)** Gaussian size distribution of cubic NaYF<sub>4</sub> UCNPs (data as reported by Sikora et al., (2013)<sup>5</sup>) is well described by a normal distribution ( $R^2 = 0.96$ ). **(b)** The corresponding molecular weight distribution of UCNPs on a linear molecular weight scale and **(c)** on a lognormal scale. The molecular weight distribution in **(c)** is well fitted by a log normal distribution ( $R^2 = 0.98$ ).

## Discussion

Our method to estimate the molecular weight of NaYF<sub>4</sub>:RE UCNPs relies on two basic assumptions: 1. that UCNPs are of homogenous composition, and 2. that the lattice parameters are accurate. The first assumption can be tested by TEM and XRD, and the second assumption can be experimentally verified via XRD. Ensuring accurate lattice parameters is particularly important when estimating the molecular weight of UCNPs with arbitrarily large dopant concentrations. For example, Wang et al., (2010)<sup>40</sup> experimentally demonstrated that by doping a hexagonal phase NaYF<sub>4</sub>:Yb,Er UCNP (18% Yb, 2% Er) with increasing concentrations of Gd<sup>3+</sup> increases the lattice parameters of the UCNP significantly, resulting in an increased unit cell volume. Thus, because of this dependence of lattice parameter on RE dopant percentage, our estimations of UCNP molecular weight in Figure 3 may be an over-estimation on true values if lattice parameters are not independently verified for each RE dopant concentration of interest. We assumed a spherical geometry here, but our method could be trivially adapted for arbitrary nanoparticle geometries; e.g. rods,<sup>40,45</sup> triangular,<sup>46</sup> or prism-shaped<sup>47</sup> nanoparticles. The extension of our technique to arbitrary geometries, arbitrary crystal lattice parameters, and arbitrary elemental composition is demonstrated by the development and application of an advanced GUI incorporating all of these variables (see Figure S2). Further, our method does not account for any surface functionalisation or enhancement. Thus the molecular weight of UCNPs modified by addition of a silica<sup>24,32,33</sup> or calcium fluoride<sup>48</sup> shell coating will be somewhat different from the molecular weight estimated by our technique. Our method could be augmented by estimating the molecular weight of UCNP shell coating layers and thus provide enhanced molecular weight information for surface functionalisation applications. The method presented here could be applied to nanoparticles of varying composition (e.g. silica or gold nanoparticles) with known crystal lattice parameters, known unit cell volume, and known nanoparticle size/geometry. It should be noted that a simple theory for estimation of the molecular weight of a single homogenous gold nanoparticle was proposed by Lewis et al. (2006),<sup>49</sup> but this theory did not account for unit cell parameters or elemental doping. Further, it did not describe the molecular weight distribution of a population of nanoparticles. In future, it would be ideal to test the accuracy of our molecular weight estimation against an experimental method for determining molecular weight such as size exclusion chromatography,<sup>50</sup> mass spectrometry,<sup>50</sup> or sedimentation-velocity analytical ultracentrifugation.<sup>51,52</sup>

It is of note that for a given population of UCNPs with a Gaussian diameter distribution the corresponding molecular weight distribution will be lognormal (see Figure 5). This lognormal distribution arises from the fact that molecular weight scales exponentially with diameter. This

lognormal distribution will be important to consider, in that a large fraction of UCNP will be of a significantly lower or higher molecular weight than the arithmetic mean UCNP.

Estimation of molecular weight of NaYF<sub>4</sub>:RE UCNP could be of use in multiple applications. Knowledge of UCNP molecular weight will likely be of great utility in studies where UCNP surfaces are functionalised with additional molecules such as antibodies<sup>22,24–26</sup> or oligonucleotides.<sup>34</sup> If the molecular weight of UCNP is known, then the molar concentrations of substances in the functionalisation processes can be altered to reach desired parameters. When combined with estimation of UCNP surface area, this could inform the optimisation of functionalisation for a given application. Knowing the molecular weight of UCNP would also be beneficial in the processing of particles for downstream applications. In particular, steps taken to functionalise the nanoparticles may require separation procedures to remove unreacted moieties or unwanted reactants. If the molecular weight of UCNP were known, then it may be beneficial for the optimisation of conjugation stoichiometry, which can be concentration dependant. The reaction rates of UCNP will be heavily influenced by their molecular weight; thus a greater understanding of their molecular weight may increase the knowledge of thermodynamic properties of the UCNP System. This is particularly important when considering the use of bio-receptors with UCNP where the mass of the particle may affect the binding kinetics of the UCNP-receptor construct.

The molecular weight of UCNP will also be of interest in the study of cytotoxicity, bio-distribution, cellular uptake, and clearance of UCNP in biological systems.<sup>3,5</sup> Currently, it is difficult to compare the results from various imaging and therapeutic studies because UCNP concentration is reported as weight of UCNP per volume of aqueous media (i.e. mg/mL or similar).<sup>3</sup> This is a crude measure which does not quantify number of UCNP in a given sample. For example, nanoparticles can induce membrane damage<sup>39</sup> and initiate apoptosis (programmed cell-death).<sup>53,54</sup> Thus, understanding the molar concentration of UCNP would help assessment of cytotoxicity effects. A standardised protocol based on molecular weight of UCNP would help assessment of where UCNP accumulate *in vivo* and what time is required to clear the UCNP from the various organs (e.g., lung, liver, kidney, heart)<sup>4</sup> or tumours.<sup>48</sup> Reporting the molar concentration of UCNP composites may also help to develop highly-localised targeted delivery of therapeutic drugs to the required sites in the body, leading to better controlled targeted photodynamic therapy,<sup>15</sup> and for improved targeted drug delivery.<sup>16</sup>

## Conclusions

We have presented a theoretical method to estimate the molecular weight of hexagonal and cubic crystal lattice phase NaYF<sub>4</sub>:RE UCNPs from experimentally measured UCNP crystal lattice parameters and nanoparticle diameters. Our calculations assume spherical NaYF<sub>4</sub>:RE UCNP geometry, but our technique can easily be extended to estimate the molecular weight for nanoparticles with arbitrary geometries (e.g. cubes, rods, triangles, or tetrahedrons) and with arbitrary crystal lattice (e.g. cubic, hexagonal, orthorhombic), and arbitrary elemental compositions. It should be noted that our method does not account for any surface modification of nanoparticles, only the molecular weight of the NaYF<sub>4</sub>:RE lattice itself. We expect this method will be highly accurate in estimation of the molecular weight of NaYF<sub>4</sub>:RE UCNPs where the crystal lattice parameters of non-surface modified UCNPs have been experimentally verified. Direct experimental validation of our technique is desirable.

UCNP molecular weight was found to increase exponentially with UCNP diameter. Thus a small increase in UCNP diameter results in a large increase in UCNP molecular weight. For example, the molecular weight of NaYF<sub>4</sub> UCNPs were estimated to be ~ 1 MDa for a UCNP of 10 nm diameter, and ~ 100 MDa for a UCNP of 45 nm diameter. From this relation, we demonstrated that a population of UCNPs with a Gaussian diameter distribution will have a lognormal molecular weight distribution.

Our method to estimate the molecular of NaYF<sub>4</sub>:RE UCNP populations will be of utility in a variety of applications, including the study of UCNP uptake by cells; separation of UCNPs by molecular weight, optical tweezing of UCNPs, and UCNP surface functionalisation for bio-imaging, bio-sensing, and therapeutic applications. Additionally we provide a stand-alone GUI to allow others to calculate molecular weight of spherical NaYF<sub>4</sub>:RE UCNPs of arbitrary crystal lattice parameters, arbitrary diameters, and arbitrary RE dopant compositions.



## 4. References

1. Mader, H. S., Kele, P., Saleh, S. M. & Wolfbeis, O. S. Upconverting luminescent nanoparticles for use in bioconjugation and bioimaging. *Curr. Opin. Chem. Biol.* **14**, 582–596 (2010).
2. Wang, F., Banerjee, D., Liu, Y., Chen, X. & Liu, X. Upconversion nanoparticles in biological  
340 labeling, imaging, and therapy. *Analyst* **135**, 1839–1854 (2010).
3. Gnach, A., Lipinski, T., Bednarkiewicz, A., Rybka, J. & Capobianco, J. a. Upconverting nanoparticles: assessing the toxicity. *Chem. Soc. Rev.* **44**, 1561–1584 (2015).
4. Zou, R. *et al.* Silica shell-assisted synthetic route for mono-disperse persistent nanophosphors with enhanced in vivo recharged near-infrared persistent luminescence. *Nano Res.* (2017). doi:10.1007/s12274-016-1396-z
5. Sikora, B. *et al.* Transport of NaYF<sub>4</sub>:Er<sup>3+</sup>, Yb<sup>3+</sup> up-converting nanoparticles into HeLa cells. *Nanotechnology* **24**, 235702 (2013).
6. Cao, T. *et al.* Water-soluble NaYF<sub>4</sub>:Yb/Er upconversion nanophosphors: Synthesis, characteristics and application in bioimaging. *Inorg. Chem. Commun.* **13**, 392–394 (2010).
- 350 7. Ma, Y. *et al.* Labeling and long-term tracking of bone marrow mesenchymal stem cells in vitro using NaYF<sub>4</sub>:Yb<sup>3+</sup>,Er<sup>3+</sup> upconversion nanoparticles. *Acta Biomater.* **42**, 199–208 (2016).
8. Kostiv, U. *et al.* RGDS- and TAT-Conjugated Upconversion of NaYF<sub>4</sub>:Yb<sup>3+</sup>/Er<sup>3+</sup>&SiO<sub>2</sub> Nanoparticles: In Vitro Human Epithelioid Cervix Carcinoma Cellular Uptake, Imaging, and Targeting. *ACS Appl. Mater. Interfaces* **8**, 20422–20431 (2016).
9. Shi, Y. *et al.* Stable Upconversion Nanohybrid Particles for Specific Prostate Cancer Cell Immunodetection. *Nat. Publ. Gr.* 1–11 (2016). doi:10.1038/srep37533
10. Rao, L. *et al.* Erythrocyte Membrane-Coated Upconversion Nanoparticles with Minimal Protein Adsorption for Enhanced Tumor Imaging. (2017). doi:10.1021/acsami.6b14450
- 360 11. Hu, G. *et al.* Upconversion Nanoparticles and Monodispersed Magnetic Polystyrene Microsphere Based Fluorescence Immunoassay for the Detection of Sulfaquinolone in Animal-Derived Foods. *J. Agric. Food Chem.* **64**, 3908–3915 (2016).
12. Dai, S., Wu, S., Duan, N. & Wang, Z. A luminescence resonance energy transfer based aptasensor for the mycotoxin Ochratoxin A using upconversion nanoparticles and gold nanorods. *Microchim. Acta* **183**, 1909–1916 (2016).
13. Guo, X., Wu, S., Duan, N. & Wang, Z. Mn<sup>2+</sup>-doped NaYF<sub>4</sub>:Yb/Er upconversion nanoparticle-based electrochemiluminescent aptasensor for bisphenol A. *Anal. Bioanal. Chem.* **408**, 3823–3831 (2016).
14. Chen, Q., Hu, W., Sun, C., Li, H. & Ouyang, Q. Synthesis of improved upconversion

- 370 nanoparticles as ultrasensitive fluorescence probe for mycotoxins. *Anal. Chim. Acta* **938**,  
137–145 (2016).
15. Liang, L. *et al.* Facile Assembly of Functional Upconversion Nanoparticles for Targeted  
Cancer Imaging and Photodynamic Therapy. *ACS Appl. Mater. Interfaces* **8**, acsami.6b00713  
(2016).
16. Yang, X. *et al.* Synthesis of a core/satellite-like multifunctional nanocarrier for pH- and NIR-  
triggered intracellular chemothermal therapy and tumor imaging. *RSC Adv.* **7**, 7742–7752  
(2017).
17. Geitenbeek, R. G. *et al.* NaYF<sub>4</sub>:Er<sup>3+</sup>, Yb<sup>3+</sup>/SiO<sub>2</sub> Core/Shell Upconverting Nanocrystals for  
Luminescence Thermometry up to 900 K. *J. Phys. Chem. C* acs.jpcc.6b10279 (2017).  
380 doi:10.1021/acs.jpcc.6b10279
18. Zheng, K., Zhao, D., Zhang, D., Liu, N. & Qin, W. Temperature-dependent six-photon  
upconversion fluorescence of Er<sup>3+</sup>. *J. Fluor. Chem.* **132**, 5–8 (2011).
19. Shao, W. *et al.* A core–multiple shell nanostructure enabling concurrent upconversion and  
quantum cutting for photon management. *Nanoscale* **11**, 11081–11095 (2017).
20. Li, F.-C. & Kitamoto, Y. Fabrication of UCNPs/TiO<sub>2</sub> aerogel photocatalyst to improve  
photocatalytic performance. **20013**, 20013 (2017).
21. Fu, X., Chen, L. & Choo, J. Optical Nanoprobes for Ultrasensitive Immunoassay. *Anal. Chem.*  
**1**, 124–137 (2016).
22. Gao, N., Ling, B., Gao, Z., Wang, L. & Chen, H. Near-infrared-emitting NaYF<sub>4</sub>:Yb,Tm/Mn  
390 upconverting nanoparticle/gold nanorod electrochemiluminescence resonance energy  
transfer system for sensitive prostate-specific antigen detection. *Anal. Bioanal. Chem.*  
(2017). doi:10.1007/s00216-017-0212-2
23. Juntunen, E. *et al.* Effects of blood sample anticoagulants on lateral flow assays using  
luminescent photon-upconverting and Eu(III) nanoparticle reporters. *Anal. Biochem.* **492**,  
13–20 (2016).
24. Jo, E. J., Mun, H. & Kim, M. G. Homogeneous Immunosensor Based on Luminescence  
Resonance Energy Transfer for Glycated Hemoglobin Detection Using Upconversion  
Nanoparticles. *Anal. Chem.* **88**, 2742–2746 (2016).
25. Tang, J., Lei, L., Feng, H., Zhang, H. & Han, Y. Preparation of K<sup>+</sup>-Doped Core-Shell NaYF<sub>4</sub>:Yb,  
400 Er Upconversion Nanoparticles and its Application for Fluorescence  
Immunochromatographic Assay of Human Procalcitonin. *J. Fluoresc.* **26**, 2237–2246 (2016).
26. Lei, L. *et al.* A rapid and user-friendly assay to detect the Neutrophil gelatinase-associated  
lipocalin (NGAL) using up-converting nanoparticles. *Talanta* **162**, 339–344 (2017).

27. Haase, M. & Schäfer, H. Upconverting nanoparticles. *Angew. Chemie - Int. Ed.* **50**, 5808–5829 (2011).
28. Jacques, S. L. Optical properties of biological tissues: a review. *Phys. Med. Biol.* **58**, R37–61 (2013).
29. Wang, M. *et al.* NIR-responsive silica-coated NaYbF<sub>4</sub>:Er/Tm/Ho upconversion fluorescent nanoparticles with tunable emission colors and their applications in immunolabeling and  
410 fluorescent imaging of cancer cells. *J. Phys. Chem. C* **113**, 19021–19027 (2009).
30. Krämer, K. W. *et al.* Hexagonal Sodium Yttrium Fluoride Based Green and Blue Emitting Upconversion Phosphors. *Chem. Mater.* **16**, 1244–1251 (2004).
31. Wang, F., Wang, J. & Liu, X. Direct evidence of a surface quenching effect on size-dependent luminescence of upconversion nanoparticles. *Angew. Chemie - Int. Ed.* **49**, 7456–7460 (2010).
32. Lü, Q., Guo, F., Sun, L., Li, A. & Zhao, L. Silica-/titania-coated Y<sub>2</sub>O<sub>3</sub>: Tm<sup>3+</sup>, Yb<sup>3+</sup> nanoparticles with improvement in upconversion luminescence induced by different thickness shells. *J. Appl. Phys.* **103**, (2008).
33. Arppe, R. *et al.* Quenching of the upconversion luminescence of NaYF<sub>4</sub>:Yb<sup>3+</sup>,Er<sup>3+</sup> and NaYF<sub>4</sub>:Yb<sup>3+</sup>,Tm<sup>3+</sup> nanophosphors by water: the role of the sensitizer Yb<sup>3+</sup> in non-radiative  
420 relaxation. *Nanoscale* **7**, 11746–11757 (2015).
34. Park, Y. Il *et al.* Facile Coating Strategy to Functionalize Inorganic Nanoparticles for Biosensing. *Bioconjug. Chem.* (2016). doi:10.1021/acs.bioconjchem.6b00524
35. Chen, F., Bu, W., Cai, W. & Shi, J. Functionalized upconversion nanoparticles: versatile nanoplatforms for translational research. *Curr. Mol. Med.* **13**, 1613–32 (2013).
36. Doughan, S., Uddayasankar, U. & Krull, U. J. A paper-based resonance energy transfer nucleic acid hybridization assay using upconversion nanoparticles as donors and quantum dots as acceptors. *Analytica Chimica Acta* **878**, (Elsevier B.V., 2015).
37. Chen, J. *et al.* Controllable synthesis of NaYF<sub>4</sub>: Yb,Er upconversion nanophosphors and their  
430 application to in vivo imaging of *Caenorhabditis elegans*<sup>†</sup>. *J. Mater. Chem.* **21**, 1–16 (2012).
38. Haro-González, P. *et al.* Optical trapping of NaYF<sub>4</sub>:Er<sup>3+</sup>,Yb<sup>3+</sup> upconverting fluorescent nanoparticles. *Nanoscale* **5**, 12192–9 (2013).
39. Nel, A. E. *et al.* Understanding biophysicochemical interactions at the nano-bio interface. *Nat. Mater.* **8**, 543–557 (2009).
40. Wang, F. *et al.* Simultaneous phase and size control of upconversion nanocrystals through lanthanide doping. *Nature* **463**, 1061–1065 (2010).
41. Cong, T. *et al.* Upconversion luminescence enhancement in NaYF<sub>4</sub>: Yb<sup>3+</sup>, Er<sup>3+</sup> nanoparticles

induced by Cd<sup>2+</sup> tridoping. *Mater. Res. Bull.* (2017). doi:10.1016/j.materresbull.2017.02.032

42. Menyuk, N., Dwight, K. & Pierce, J. W. NaYF<sub>4</sub>: Yb,Er - An efficient upconversion phosphor. *Appl. Phys. Lett.* **21**, 159–161 (1972).
43. Momma, K. & Izumi, F. VESTA 3 for three-dimensional visualization of crystal, volumetric and morphology data. *J. Appl. Crystallogr.* **44**, 1272–1276 (2011).
44. Meija, J. *et al.* Atomic weights of the elements 2013 (IUPAC Technical Report). *Pure Appl. Chem.* **88**, 265–291 (2016).
45. Na, H., Woo, K., Lim, K. & Jang, H. S. Rational morphology control of β-NaYF<sub>4</sub>:Yb,Er/Tm upconversion nanophosphors using a ligand, an additive, and lanthanide doping. *Nanoscale* **5**, 4242–51 (2013).
46. Jia, H., Xu, W., An, J., Li, D. & Zhao, B. A simple method to synthesize triangular silver nanoparticles by light irradiation. *Chem. Commun.* **64**, 956–960 (2006).
47. Shan, J., Uddi, M., Wei, R., Yao, N. & Ju, Y. The Hidden Effects of Particle Shape and Criteria for Evaluating the Upconversion Luminescence of the Lanthanides Doped Nanophosphors. *J. Phys. Chem. C* **114**, 2452–2461 (2010).
48. Li, H., Hao, S., Yang, C. & Chen, G. Synthesis of Multicolor Core/Shell NaLuF<sub>4</sub>:Yb<sup>3+</sup>/Ln<sup>3+</sup>@CaF<sub>2</sub> Upconversion Nanocrystals. *Nanomaterials* **7**, 34 (2017).
49. Lewis, D. J., Day, T. M., MacPherson, J. V. & Pikramenou, Z. Luminescent nanobeads: attachment of surface reactive Eu(III) complexes to gold nanoparticles. *Chem. Commun.* 1433–1435 (2006). doi:10.1039/B518091K
50. Bootz, A., Russ, T., Gores, F., Karas, M. & Kreuter, J. Molecular weights of poly(butyl cyanoacrylate) nanoparticles determined by mass spectrometry and size exclusion chromatography. *Eur. J. Pharm. Biopharm.* **60**, 391–399 (2005).
51. Bootz, A., Vogel, V., Schubert, D. & Kreuter, J. Comparison of scanning electron microscopy, dynamic light scattering and analytical ultracentrifugation for the sizing of poly(butyl cyanoacrylate) nanoparticles. *Eur. J. Pharm. Biopharm.* **57**, 369–375 (2004).
52. Carney, R. P. *et al.* Determination of nanoparticle size distribution together with density or molecular weight by 2D analytical ultracentrifugation. *Nat. Commun.* **2**, 335 (2011).
53. Bexiga, M. G. *et al.* Cationic nanoparticles induce caspase 3-, 7- and 9-mediated cytotoxicity in a human astrocytoma cell line. *Nanotoxicology* **5**, 557–567 (2011).
54. Hou, Z. *et al.* UV-Emitting Upconversion-Based TiO<sub>2</sub> Photosensitizing Nanoplatform: Near-Infrared Light Mediated *in Vivo* Photodynamic Therapy via Mitochondria-Involved Apoptosis Pathway. *ACS Nano* **9**, 2584–2599 (2015).

## Supplementary material:

### MATLAB Executable GUIs

Two stand-alone GUIs were created to enable calculation of UCNP molecular weight (the simple GUI, Figure S1), and the molecular weight of nanoparticles with arbitrary parameters (the advanced GUI, Figure S2). These GUIs are shown Figures S1 and S2. [\[Download Link\]](#). NB: the final peer-reviewed manuscript will link to a data repository with a DOI.

480

These GUIs were developed as stand-alone applications for Windows PCs (Windows 7 or newer) and are not compatible with Macintosh or Linux PCs. The GUIs were compiled into stand-alone 64-bit executable files by using the MATLAB compiler toolbox *deploytool* functionality. The GUIs were tested on 64-bit PCs running Windows 10. The first installation of a GUI was found to take around 45 minutes: this is primarily due to the automated download and installation of the required MATLAB runtime. After MATLAB runtime installation, the GUIs start-up time is typically < 10 seconds. Note that a MATLAB runtime compatible with MATLAB 2016a or newer is required to run these GUIs, and that MATLAB runtime versions older than 2016a may need to be removed from PCs prior to GUI installation.

490

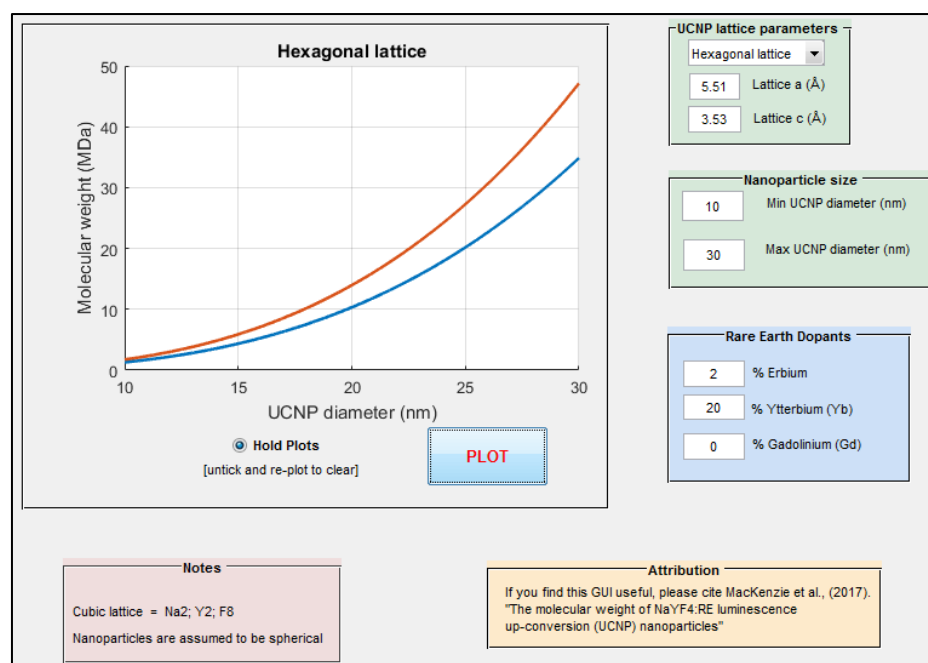

**Figure S1.** The basic GUI developed to estimate the molecular weight of NaYF<sub>4</sub>:RE UCNPs of spherical geometry and cubic or hexagonal lattice parameters.

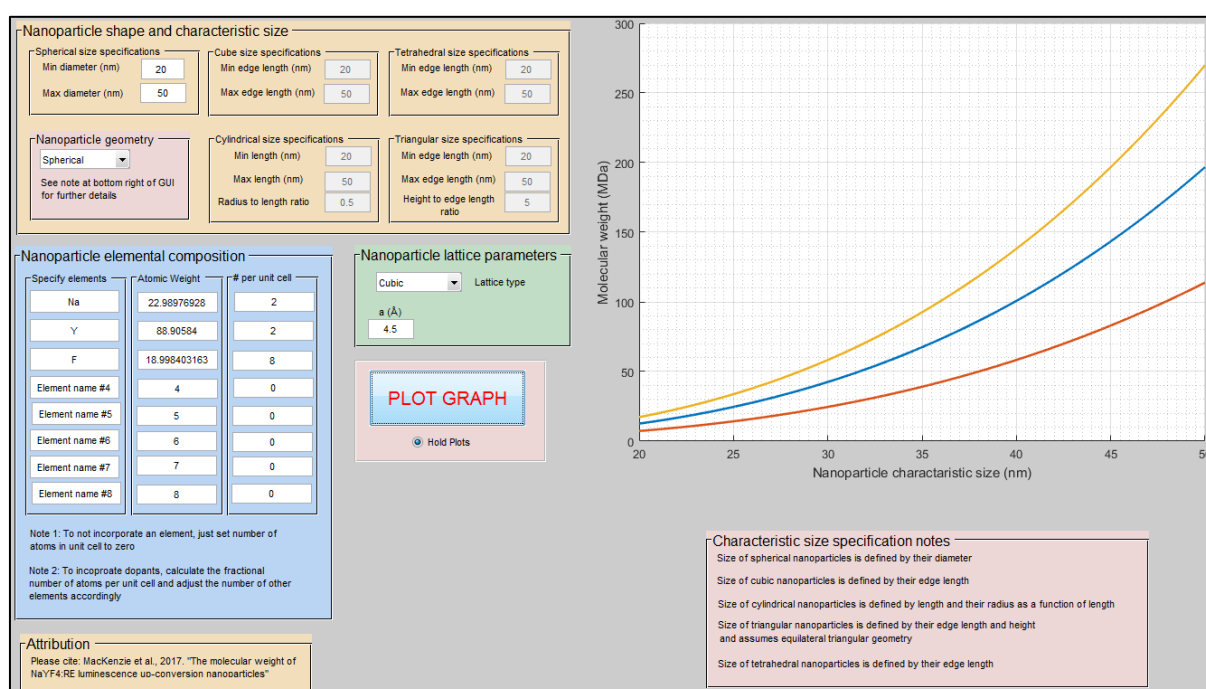

**Figure S2.** The advanced GUI developed to estimate the molecular weight of nanoparticles with arbitrary elemental constituents; arbitrary cubic or hexagonal lattice spacing; and arbitrary nanoparticle geometry.

500

## 5. Acknowledgements

This work was enabled by funding from the BBSRC Tools and Development Resources Fund (TDRF). Padmaja P. Nampi is supported by a European Commission Marie Skłodowska-Curie Research Fellowship for Experienced Researchers.

## 6. Author contributions

- L.E.M and J.A.G. conceived the research concept and wrote the manuscript.
- L.E.M. performed all calculations, provided Figures 2, 3, 4, 5, 6, and created the stand-alone graphic user interface.
- J.A.G. provided Figure 1.
- All authors contributed to the manuscript and reviewed the manuscript.

510

## 7. Competing financial interests

The authors declare no competing financial interests
